# Supplementary material
Source: publisher figshare collection journal article supplement (https://tandf.figshare.com/ndownloader/files/14702180)
Supplement: Supplementary file 1 [file 14702180]

Supporting Information

**Syntheses, characterization, DNA/HSA binding ability, and antitumor activities of a family of isostructural binuclear lanthanide complexes containing hydrazine Schiff base**

Xue-Qing Songa,1, Zhi-Gang Wanga,1, Yang Wanga, Yu-Ying Huanga, Yu-Xuan Suna, Yan Ouyanga,b, Cheng-Zhi Xiea,b,*, Jing-Yuan Xua,*

aTianjin Key Laboratory on Technologies Enabling Development of Clinical Therapeutics and Diagnostics (Theranostics), School of Pharmacy, Tianjin Medical University, Tianjin 300070, P. R. China.

bKey Laboratory of Advanced Energy Materials Chemistry (Ministry of Education), Nankai University, Tianjin 300071, P. R. China.

1 These authors contributed equally to this work.

Corresponding author. E-mail address: xujingyuan@tmu.edu.cn (J.–Y. Xu), xiechengzhi@tmu.edu.cn (C.–Z. Xie)


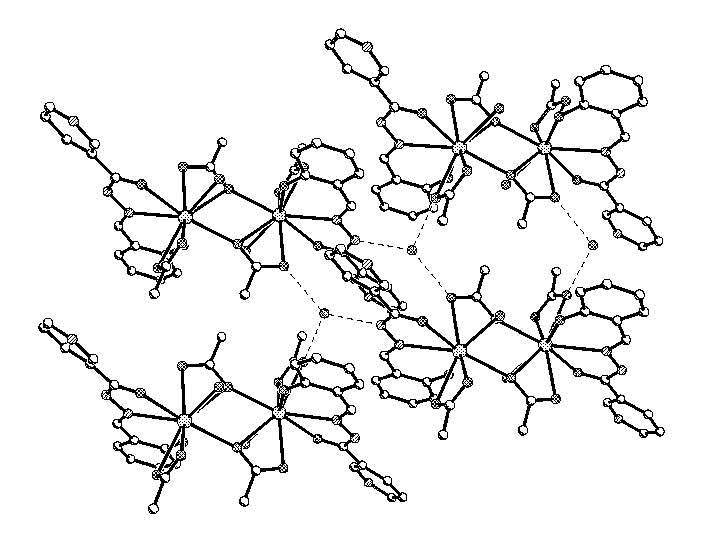


**Fig. S1**. Views of the molecular packing diagram showing the 2D structure with inter-molecular hydrogen bonds (hydrogen atoms were omitted for clarity).


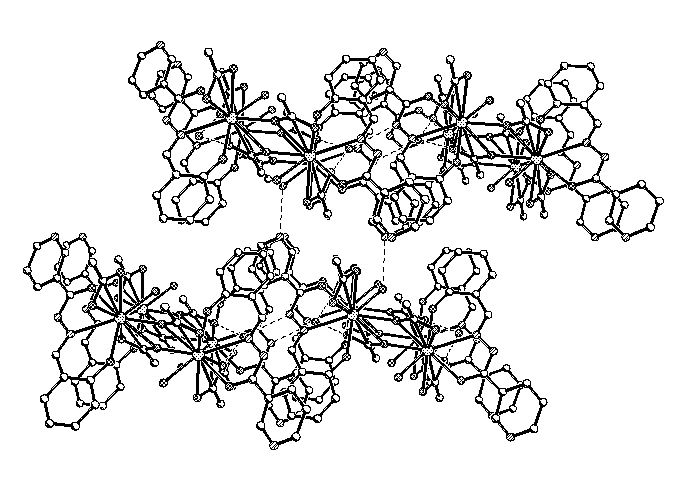


**Fig. S2**. Views of the molecular packing diagram showing the 3D structure with inter-molecular hydrogen bonds (hydrogen atoms were omitted for clarity).

**Fig. S3**. IR Spectrum of [La2(L)2(μ3-OAc)4(H2O)2]2H2O (**1**)

**Fig. S4**. IR Spectrum of [Eu2(L)2(μ3-OAc)4(H2O)2]2H2O (**1**)

**Fig. S5**. IR Spectrum of [Dy2(L)2(μ3-OAc)4(H2O)2]2H2O (**1**)

**Fig. S6**. IR Spectrum of HL.


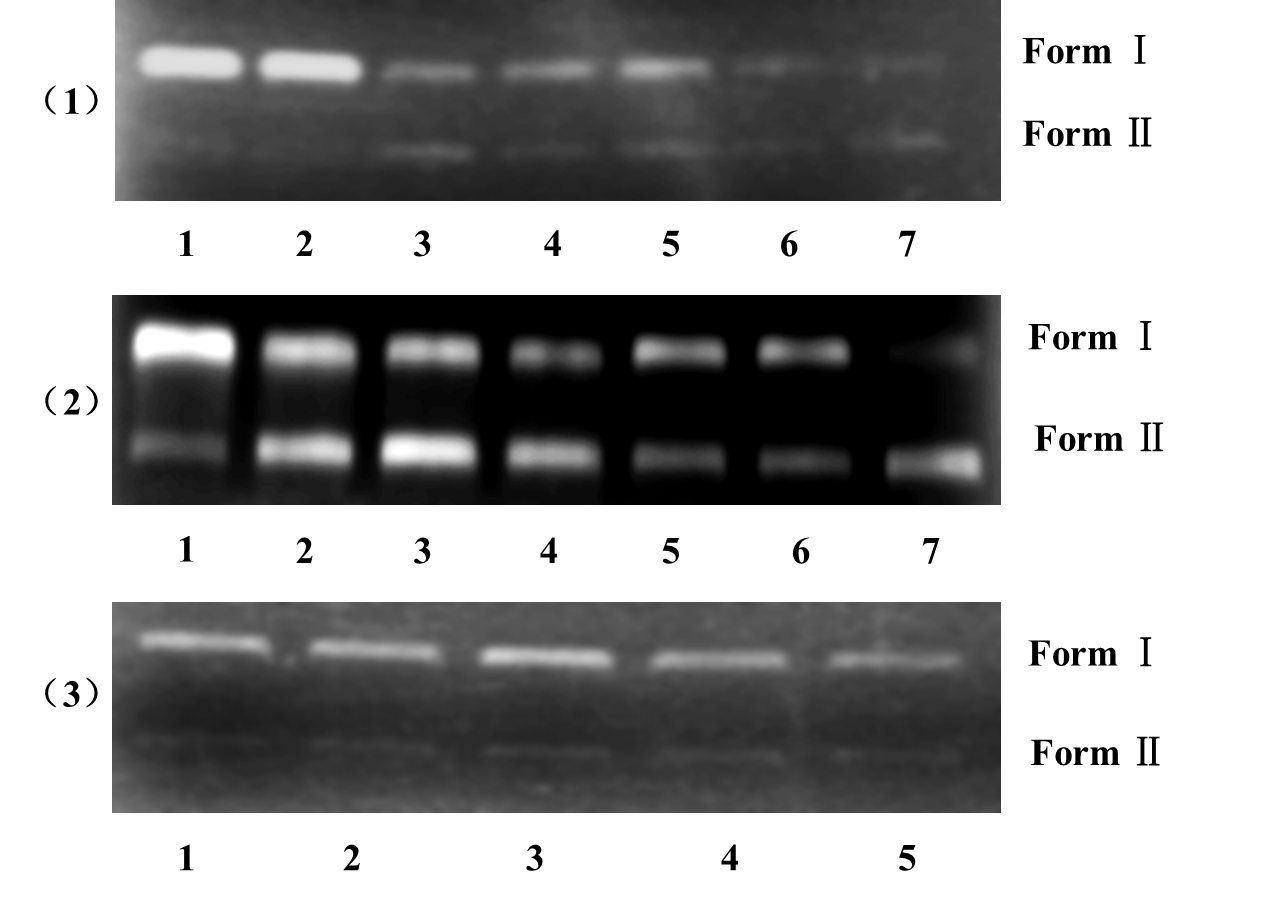


**Fig. S7.** Cleavage of plasmid pUC19 DNA (0.1 g/L) with varying concentrations of complexes in the presence of H2O2 (250 μM). Lane 0: DNA control; Lane 2: DNA control + H2O2. For complex **1**: lane 3: DNA + **1** (3.125 μM) + H2O2; lane 4: DNA +**1** (6.25 μM) + H2O2; lane 5: DNA +**1** (12.5 μM) + H2O2; lane 6: DNA +**1** (25 μM) + H2O2; lane 7: DNA +**1** (50 μM) + H2O2. For complex **2**: lane 3: DNA + **1** (0.1 μM) + H2O2; lane 4: DNA +**1** (0.5 μM) + H2O2; lane 5: DNA +**1** (2.5 μM) + H2O2; lane 6: DNA +**1** (12.5 μM) + H2O2; lane 7: DNA +**1** (62.5 μM) + H2O2. For complex **3**: lane 3: DNA + **1** (0.5 μM) + H2O2; lane 4: DNA +**1** (2.5 μM) + H2O2; lane 5: DNA +**1** (5 μM) + H2O2.


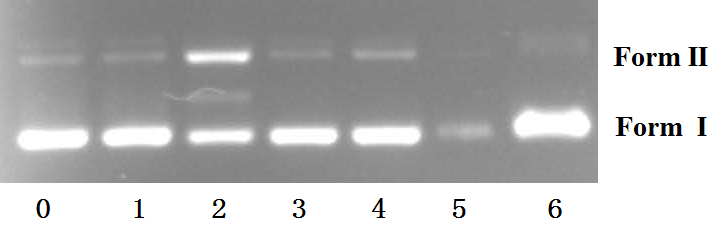


**Fig. S8.** Cleavage of plasmid pUC19 DNA in the presence of 6.25 M complex **1** and different inhibitors. Lane 0: DNA control; Lane 1: DNA + 250 M H2O2; Lane 2: DNA + 250 M H2O2 + complex **1**; Lane 3–6: DNA + H2O2 + complex **1**+ inhibitors (50 mM DMSO, 50 mM KI, 50 mM L-histidine, 50 mM NaN3).

**Table S1**. hydrogen bond lengths (Å) and angles () for **1**.

| D-H…A | d(D-H) | d(H...A) | d(D...A) | (DHA) |
| --- | --- | --- | --- | --- |
| O(8)-H(8A)...O(5) | 0.847(10) | 1.903(11) | 2.744(3) | 172(4) |
| N(2)-H(2A)...O(8)#1 | 0.86 | 1.96 | 2.797(3) | 164.7 |
| O(8)-H(8B)...O(4)#2 | 0.842(10) | 1.873(12) | 2.705(3) | 169(3) |
| O(6)-H(6A)...N(3)#3 | 0.855(10) | 1.946(13) | 2.786(3) | 167(3) |

Symmetry transformations used to generate equivalent atoms: #1 -x+1, -y, -z+1; #2 x+1, y, z; #3 -x+1, -y+1, -z+1.
